# Supplementary material for: Concomitant Expression of Prolactin Receptor and TGFβ Receptors in Breast Cancer: Association with Less Aggressive Phenotype and Favorable Patient Outcome
Source: PubMed Central journal article supplement (PMC6479350; doi:10.3390/ijms20071640), 2019-04-02
Supplement: ijms-20-01640-s001.pdf [file ijms-20-01640-s001.pdf]

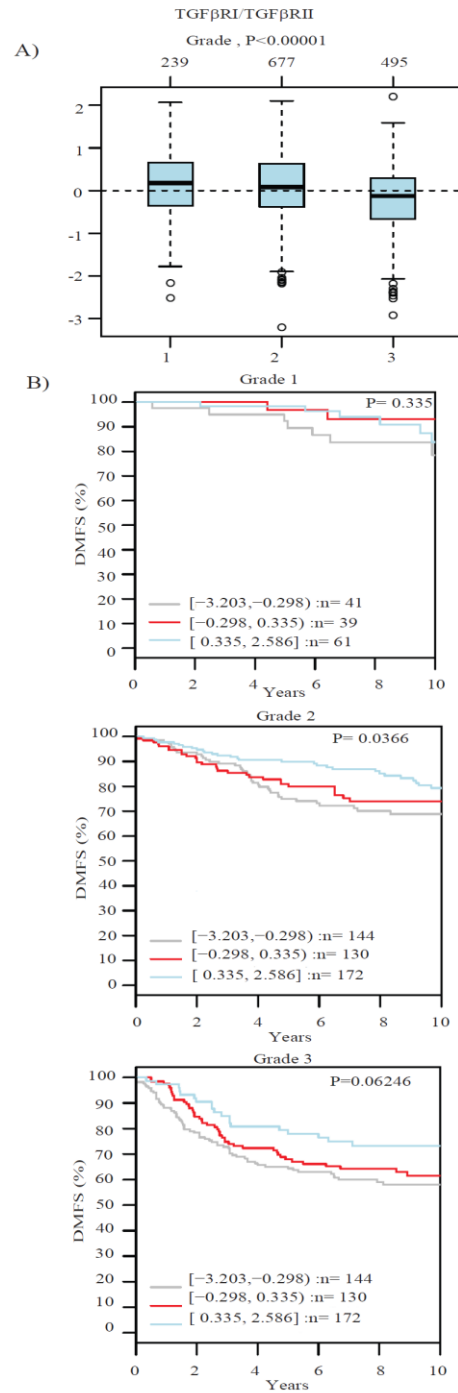

**Figure Supplemental 1: TGFβRI/TGFβRII gene signature and its association with tumor grade and patient outcome**

- A) TGFβRI/TGFβRII gene signature and its association with tumor grade using 1881 breast cancer cases of GOBO database.
- B) TGFβRI/TGFβRII gene signature and its association with patient outcome using DMFS as an end point in different tumor grades using 1881 breast cancer cases of GOBO database.
